# Supplementary material for: Artificial photosynthesis for solar hydrogen generation over transition-metal substituted Keggin-type titanium tungstate
Source: Royal Society of Chemistry journal article supplement (doi:10.1039/c3nj01184d), 2013-12-16
Supplement: c3nj01184d.pdf [file c3nj01184d.pdf]

## Supporting Information

### **Artificial photosynthesis for solar hydrogen generation over transition-metal substituted Keggin-type titanium tungstate**

**Xinke Shang,<sup>a,b</sup> Rongji Liu,<sup>a,b</sup> Guangjin Zhang,<sup>\*a</sup> Suojiang Zhang,<sup>a</sup> Hongbin Cao,<sup>\*a</sup> and Zhanjun Gu<sup>c</sup>**

*<sup>a</sup> Key laboratory of Green Process Engineering, Institute of Process Engineering, Chinese Academy of Sciences, 100190, Beijing, China*

*<sup>b</sup> University of Chinese Academy of Sciences, 100049, Beijing, China*

*<sup>c</sup> Key Laboratory for Biomedical Effects of Nanomaterials and Nanosafety, Institute of High Energy Physics, Chinese Academy of Sciences, Beijing, 100049, P. R.China*

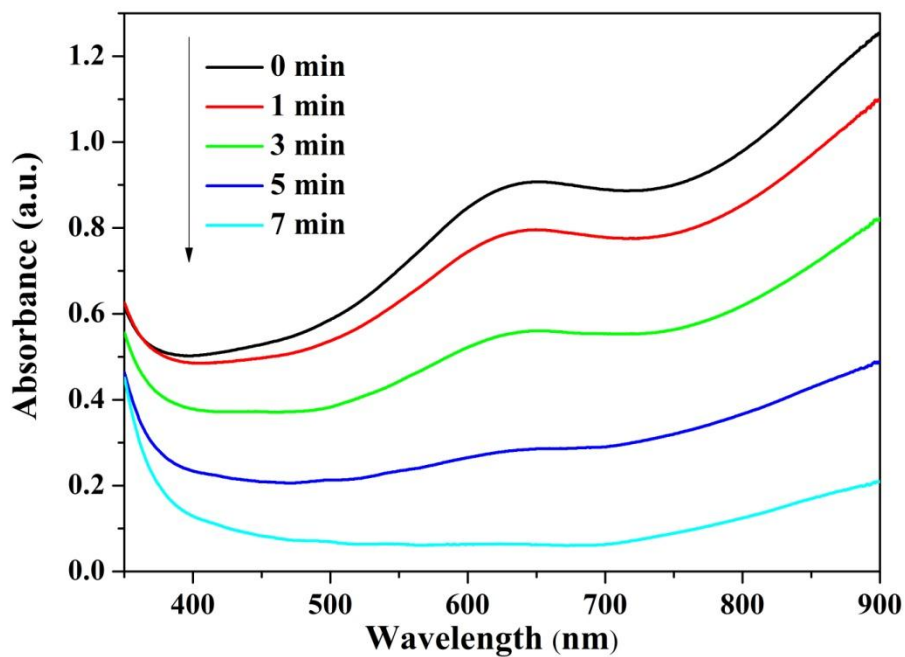

**Fig. S1** Absorbance variation of HPB (TiW<sub>11</sub>Co) over visible light (400-760 nm) irradiation time.

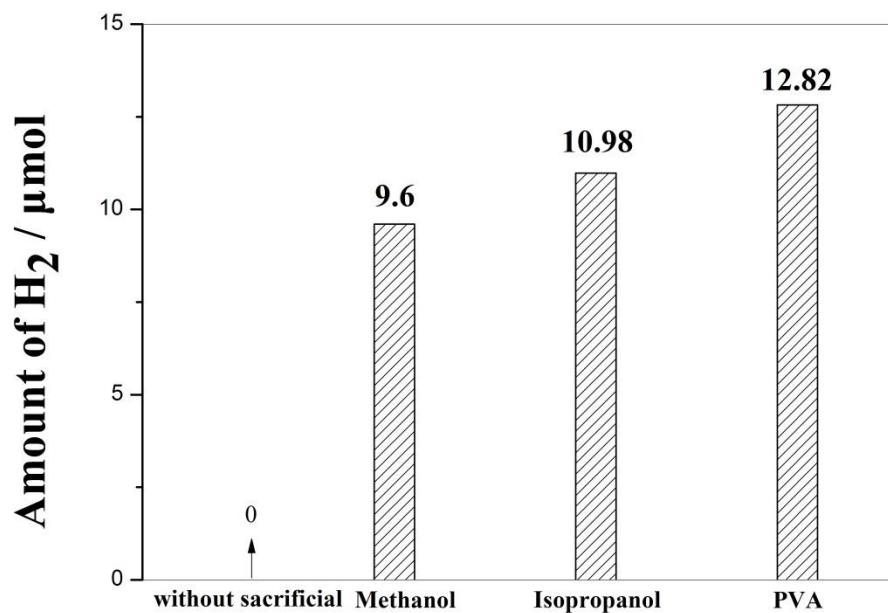

**Fig. S2** H<sub>2</sub> evolution over TiW<sub>11</sub>Co under the different electron donors. Reaction conditions: 0.05

mM TiW<sub>11</sub>Co, pH=1.0, irradiation time 3 h.
